# Supplementary material for: Everything you always wanted to know about gene flow in tropical landscapes (but were afraid to ask)
Source: PeerJ. 2019 Feb 13;7:e6446. doi: 10.7717/peerj.6446 (PMC6377592; doi:10.7717/peerj.6446)
Supplement: Dataset S1 [file peerj-07-6446-s001.xlsx]

## Sheet: Dataset_S1 - Dataset_S1
Taxonomic Group	Species	Study site	Ecosystem	Dispersal ability	Life history traits related to dispersal	Study extent (km²)	Unit of analysis	N	Molecular marker	N loci/markers	Study objetives	Resistance metric	Statistical method	Landscape/environmental predictor	Effect on gene flow	Included in quantitative analysis	Reference
Plants	Alsophila firma	Mexico and Central America	Terrestrial	NA	Wind dispersal	220000	population	6	cpDNA	5	Evaluate environmental and geographical factors on genetic differentiation	LCD	PMT	Current and past habitat suitability models (precipitation, temperature, and elevation)	possitive effect for habitat suitability models	N	Ramírez-Barahona & Eguiarte, 2014
	Bursera simaruba	western Panama, throughout Costa Rica, western Nicaragua and El Salvador	Terrestrial	NA	Insect pollinated; Dispersed by birds	200000	population	32	AFLP	152	Evaluate temperature gradients, precipitation seasonality, and habitat suitability on genetic differentiation	ER	PMT and Mantel Test	Annual mean temperature, precipitation seasonality, species specific habitat suitability model	possitive effect for habitat suitability models	N	Poelchau & Hamrick, 2012
	Ficus insipida	western Panama, throughout Costa Rica, western Nicaragua and El Salvador	Terrestrial	NA	Wasp pollinated; Dispersed by monkeys	200000	population	29	AFLP	115	Evaluate temperature gradients, precipitation seasonality, and habitat suitability on genetic differentiation	ER	PMT and Mantel Test	Annual mean temperature, precipitation seasonality, species specific habitat suitability model	positive effect for precipitation seasonality	N	Poelchau & Hamrick, 2012
	Brosimum alicastrum	western Panama, throughout Costa Rica, western Nicaragua and El Salvador	Terrestrial	NA	Wind and insect pollinated; Dispersed by mammals	200000	population	22	AFLP	130	Evaluate temperature gradients, precipitation seasonality, and habitat suitability on genetic differentiation	ER	PMT and Mantel Test	Annual mean temperature, precipitation seasonality, species specific habitat suitability model	positive effect for annual mean temperature	N	Poelchau & Hamrick, 2012
	Ceroxylon echinulatum	Andes in Ecuador and northeastern Peru	Terrestrial	Restricted dispersal	Insect pollinated; Dispersed by mamals and birds	315000	population	18	Microsatellites	7	Evaluate contemporary and historical environmental factors on genetic diferentiation	LCD	Mantel test	Habitat suitability model (temperature seasonality,maximum temperature of the warmest month, minimum temperature of the coldest month, temperature annual range, annual precipitation, precipitation seasonality and precipitation of the warmest quarter)	positive effect for habitat suitability models	N	Trénel et al., 2008
	Lantana camara	Kolkata, Dehradun, Mysore – India	Terrestrial	Maximum dispersal distance of few hundred kilometres	Butterfly and bird pollinated; Dispersed by birds	3287200	population and individual	37 / 218	Microsatellites	6	Evaluate environment and geographical factors on genetic differentiation	NA	PMT and Mantel Test	Habitat suitability model (ten bioclimatic and five environmental variables)	positive effect for habitat suitability models	N	Ray & Ray, 2014
	Dipteryx alata	Cerrado region	Terrestrial	NA	Bee pollinated; Dispersed by mammals	1400000	population	25	Microsatellites	8	Evaluate anthropogenic habitat fragmentation on genetic differentiation	NA	Mantel test and MRDM	Landscape metrics: forest cover by natural remmants, number of patches, edge density, mean area of fragments, mean perimeter and mean Euclidean nearest neighbor distance	positive effect for number of patches	N	de Campos Telles et al., 2014
	Quercus oleoides	Área de Conservación Guanacaste (ACG) in northwestern Costa Rica	Terrestrial	Restricted dispersal	Wind pollinated; Dispersed by mammals	1200	population	13	Microsatellites	11	Evaluate environmental, geographical, and flowering time on genetic differentiation	NA	PMT and Mantel Test	Habitat suitability models (elevation, life zone, and climate type based on annual precipitation and mean monthly temperature)	positive effect for habitat suitability models	N	Deacon & Cavender-Bares, 2015
	Abies religiosa	Southwest of Mexico City, in the National Park “Cumbres del Ajusco”	Terrestrial	NA	Wind pollinated	63	population	12	AFLP	3 / 394	Evaluate ecological and geographical factors on genetic differentiation	NA	PMT and Mantel Test	Land cover (Rock, soil and vegetation types, and hydrological region variables synthetized by multiple correspondence analysis to calculate an ecological distance)	positive effect for ecological distance	N	Méndez-González, Jardón-Barbolla & Jaramillo-Correa, 2017
	Euterpe edulis	Atlantic forest - São Paulo, Southeast Brazil	Terrestrial	600m	Bee pollinated; Dispersed by large birds	Four landscapes 2 km radius	population	16	Microsatellites	8	Evaluate landscape structure metrics on genetic diversity and differentiation	NA	PMT, Mantel Test and MLPE	Forest cover, patch size, site isolation, and matrix resistance based on land cover	negative effect for matrix resistance based on land cover	N	Carvalho et al., 2015
	Miconia affinis	Panama Canal bioregion	Terrestrial	High dispersal	Bee pollinated; Dispersed by large birds and bats	4800	population	11	Microsatellites	9	Evaluate deforestation, elevation, and environmental factors on genetic diversity and differentiation	ER	MLPE	Mean annual precipitation, mean annual temperature, elevation, forest cover	positive effect for elevation	Y	Castilla et al., 2016
	Euterpe edulis	Atlantic Forest in southern Bahia	Terrestrial	High dispersal	Bee pollinated; Dispersed by birds	3.47	population	9	Microsatellites	13	Evaluate effects of habitat fragmentation on genetic differentiation and genetic diversity	NA	GLM and LMM	Forest cover	no effect	N	Santos et al., 2016
	Carica papaya	Los Tuxtlas Biosphere Reserve in southern Veracruz, Mexico	Terrestrial	NA	Haw moth pollinated; Dispersed by mammals and birds	192	population	8	Microsatellites	6	Evaluate effects of habitat fragmentation on genetic differentiation , genetic diversity and sexy ratios	ER	Mantel test	Land cover (cattle pasture/agricultural land, secondary and primary vegetation)	no effect	N	Chávez-Pesqueira et al., 2014
	Ipomea cavalcantei	Carajás Mineral Province, Pará, Brazil	Terrestrial	Restricted dispersal	Hummingbird pollinated; Dispersed by wind	4000	individual	122	SNPs	41881	Evaluate landscape features and habitat modification (mining) on genetic diversity and differentiation	ER	MLPE	Land cover (montane savanna, forest, and mine), elevation, terrain roughness, mean temperature, and mean precipitation	positive effect for roughness and negative for forest and mine (land cover)	N	Lanes et al., 2018
	Ipomea maurandioides	Carajás Mineral Province, Pará, Brazil	Terrestrial	Restricted dispersal	Insect pollinated; Dispersed by wind	4000	individual	254	SNPs	30103	Evaluate landscape features and habitat modification (mining) on genetic diversity and differentiation	ER	MLPE	Land cover (montane savanna, forest, and mine), elevation, terrain roughness, mean temperature, and mean precipitation	negative effect for precipitation and positive effect for temperature and roughness	N	Lanes et al., 2018
	Psittacanthus schiedeanus complex	Mexico and Central America.	Terrestrial	NA	Hummingbird pollinated; Dispersed by birds	500000	population	57	Microsatellites	10	Evaluate the relationship between geography, climate, and host species on genetic differentiation	NA	Mantel test and RDA	Habitat suitability model (17 variables related to soil-water balance, temperature and precipitation)	positive effect for habitat suitability models	N	Ramírez-Barahona et al., 2017
Mammals	Propithecus tattersalli	Daraina area	Terrestrial	Restricted dispersal	NA	2450	individual	250	Microsatellites	13	Evaluate effects of habitat fragmentation on genetic differentiation	LCP	PMT	Forest cover, river, road	positive effect for forest cover and river	N	Quéméré et al., 2010
	Giraffa tippelskirchi	Kenya - East Africa Kenya	Terrestrial	High dispersal, but small home ranges	NA	3240000	population	51	Microsatellites	14	Evaluate barriers to dispersal on genetic differentiation	LCP, ER	GDM	Montly precipitation variables (Feb, Jul, Jun, May, Oct, Sept, Nov. Aug), human population density, elevation, ruggedness	negative effect for montly precipitation variables and human population density	N	Thomassen et al., 2013
	G. reticulata	Kenya - East Africa Kenya	Terrestrial	High dispersal, but small home ranges	NA	3240000	population	51	Microsatellites	14	Evaluate barriers to dispersal on genetic differentiation	LCP, ER	GDM	Montly precipitation variables (Feb, Jul, Jun, May, Oct, Sept, Nov. Aug), human population density, elevation, ruggedness	negative effect for montly precipitation variables and human population density	N	Thomassen et al., 2013
	G. camelopardalis	Kenya - East Africa Kenya	Terrestrial	High dispersal, but small home ranges	NA	3240000	population	51	Microsatellites	14	Evaluate barriers to dispersal on genetic differentiation	LCP, ER	GDM	Montly precipitation variables (Feb, Jul, Jun, May, Oct, Sept, Nov. Aug), human population density, elevation, ruggedness	negative effect for montly precipitation variables and human population density	N	Thomassen et al., 2013
	Puma concolor	Southern Brazil-Paraná, Santa Catarina, Rio grande do Sul	Terrestrial	1,341 km	NA	142119	individual	37	Microsatellites	18	Evaluate landscape permeability and sources of migrants	ER	Mantel Test	Land cover (Natural forest, open water, exotic planted forest, grasslands, agriculture, areas with water influence and shrublands, protected areas)	positive effect for protected areas (land cover)	N	Castilho et al., 2011
	Liomys pictus	Chamela-Cuixmala Biosphere Reserve - state of Jalisco, Mexico	Terrestrial	1 km (in male)	Females philopatric	2.5	population and individual	6 /104	Microsatellites	14	Evaluate topography, habitat, precipitation, and streams on genetic differentiation	LCP, ER	PMT	Elevation, precipitation, stream channels and secondary roads	positive effect for precipitation and stream channels	N	Garrido-Garduño et al., 2016
	Panthera tigris	States of Madhya Pradesh, Maharashtra, and Chhattisgarh - Central India	Terrestrial	High dispersal	NA	76913	population	4	Microsatellites	11	Evaluate landscape features and habitat corridors	LCP, LCCD, ER	Mantel test and PMT	Habitat suitability models (forest area, core forest area, forest patch size, elevation, ruggedness, agricultural land, drainage density, rainfall, road and railway density, urbanity, human density, core tiger habitats)	positive effect for habitat suitability models	N	Yumnam et al., 2014
	Procolobus gordonorum	Udzungwa Mountains - Tanzania	Terrestrial	Restricted dispersal through non-forested or matrix habitats	NA	1234	individual	90	Microsatellites	10	Evaluate landscape features on genetic differentiation	ER	MLPE	Topography, land cover, human disturbance, contemporary forest cover, historical forest cover, railroad, topographic position, topographic ruggedness, distance to the nearest village, fire density	negative effect for fire density and positive for distance to village	Y	Ruiz-Lopez et al., 2015
	Marmosops incanus	Atlantic Plateau of São Paulo Brazil	Terrestrial	NA	NA	100	population	37	Microsatellites	9	Evaluate habitat amount on genetic diversity and differentiation	NA	Mantel test	Forest cover (86%, 49%, 31% and 11%)	positive effect for forest cover	N	Balkenhol et al., 2013
	Tragelaphus buxtoni	Bale Massif and the Arsi Mountains-Ethiopia	Terrestrial	NA	NA	14775	population	6	Microsatellites	12	Evaluate matrix resistance on genetic differentiation	LCP, Cumulative Resistance	Mantel test and PMT	Land cover (forest, Erica dominated shrub, grassland, bushland, agriculture and human settlement), slope and elevation	no effect	N	Atickem et al., 2013
	Cephalophus dorsalis	Africa	Terrestrial	Large home range	Restricted to dense forest	6240000	population	46	Microsatellites	12	Evaluate major rivers and environmental gradients on genetic differentiation	LCP, ER	GDM	Habitat suitability models (elevation, annual mean temperature, mean diurnal temperature range, temperature seasonality, max temperature of warmest month, annual precipitation, precipitation seasonality, precipitation of wettest quarter, precipitation of driest quarter, surface moisture), forest cover, rivers	no effect	N	Ntie et al., 2017
	C. callipygus	Africa	Terrestrial	Large home range	Restricted to dense forest	6240000	population	46	Microsatellites	12	Evaluate major rivers and environmental gradients on genetic differentiation	LCP, ER	GDM	Habitat suitability model (elevation, annual mean temperature, mean diurnal temperature range, temperature seasonality, max temperature of warmest month, annual precipitation, precipitation seasonality, precipitation of wettest quarter, precipitation of driest quarter, surface moisture), forest cover; rivers	positive effect for habitat suitability models	N	Ntie et al., 2017
	Philantomba monticola	Africa	Terrestrial	Small home range	Not restricted to one habitat type	6240000	population	46	Microsatellites	12	Evaluate major rivers and environmental gradients on genetic differentiation	LCP, ER	GDM	Habitat suitability model (elevation, annual mean temperature, mean diurnal temperature range, temperature seasonality, max temperature of warmest month, annual precipitation, precipitation seasonality, precipitation of wettest quarter, precipitation of driest quarter, surface moisture), forest cover, rivers	possitive effect for habitat suitability models	N	Ntie et al., 2017
	Panthera tigris	Ranthambore, Madhav- Shivpuri, Panna, Bandhavgarh, Sanjay- Dubri, Palamau, Kanha, Pench, Satpura, Melghat, Tadoba- Andhari, Chandrapur and Brahmapuri- Central India	Terrestrial	Large home ranges	Forested habitats, solitary and long-ranging species	697000	individual	309	Microsatellites	13	Evaluate landscape resistance on genetic differentiation and factors that predict local population abundance	NA	Mantel test and PMT	Elevation, forest cover, topographical roughness and relative slope	positive effect for forest cover, topographical roughness and relative slope	N	Reddy et al., 2017
	Artibeus jamaicensis	San Juan- La Selva- Costa Rica	Terrestrial	High mobile	Generalist frugivorous species	1000	population	24	Microsatellites	10	Evaluate land use change and agricultural intensification within a biological corridor on genetic differentiation	LCP	MLPE	Land cover (secondary forest, pasture, pineapple, smallholder crops, tree plantations, urban areas and roads)	positive effect for pineapple (land cover)	N	Cleary, Waits & Finegan, 2017
	Carollia castanea	San Juan- La Selva- Costa Rica	Terrestrial	Low mobility	Small frugivorous species	1000	population	24	Microsatellites	16	Evaluate land use change and agricultural intensification within a biological corridor on genetic differentiation	LCP	MLPE	Land cover (secondary forest, pasture, pineapple, smallholder crops, tree plantations, urban areas and roads)	positive effect for secondary forest (land cover)	N	Cleary, Waits & Finegan, 2017
	Petaurus breviceps	Queensland Bioregion of Australia	Terrestrial	Between 300 and 800m	Nocturnal insectivore–exudivore feeders that move via gliding between trees	19800	individual	36	Microsatellites	14	Develop a novel approach for quantifying uncertainty in landscape resistance estimates	ER	LMM	Forest cover (FPC – foliage projective cover), land cover (forest, sparse vegetation, urban vegetation, urban, nonforest, main roads, highways and freeways and large inland water bodies)	positive effect for forest cover (foliage projective cover)	N	Dudaniec et al., 2016
	Petaurus norfolcensis	Queensland Bioregion of Australia	Terrestrial	Between 300 and 800m	Nocturnal insectivore–exudivore feeders that move via gliding between trees	19800	individual	106	Microsatellites	14	Develop a novel approach for quantifying uncertainty in landscape resistance estimates	ER	LMM	Forest cover (FPC – foliage projective cover), land cover (forest, sparse vegetation, urban vegetation, urban, nonforest, main roads, highways and freeways and large inland water bodies)	positive effect for forest cover (foliage projective cover)	N	Dudaniec et al., 2016
	Antechinus flavipes	Queensland Bioregion of Australia	Terrestrial	1.5 km (in male)	Omnivore–exudivore that exhibits nocturnal and diurnal behaviour.	19800	individual	55	Microsatellites	14	Develop a novel approach for quantifying uncertainty in landscape resistance estimates	ER	LMM	Forest cover (FPC – foliage projective cover), land cover (forest, sparse vegetation, urban vegetation, urban, nonforest, main roads, highways and freeways and large inland water bodies)	positive effect for forest cover (foliage projective cover)	N	Dudaniec et al., 2016
	Loxodonta africana	central and southern Tanzania	Terrestrial	High dispersal	Long-lived mega-herbivore	675000	population	7	Microsatellites	16	Evaluate historical and contemporary connectivity on genetic differentiation	ER	MRDM and Mantel Test	Slope and distance to fresh water (lakes and rivers)	negative effect for slope	N	Epps et al., 2013b
	Syncerus caffer	Caprivi Strip, Namibia-Africa	Terrestrial	High dispersal	Long-lived mega-herbivore	80000	population	6	Microsatellites	10	Evaluate potential dispersal barriers, landscape resistance on historical and recent genetic differentiation	ER	Mantel test	River distance	no effect	N	Epps et al., 2013a
	Panthera tigris	India	Terrestrial	200 km	NA	560000	population	6	Microsatellites	14	Evaluate landscape features on genetic differentiation	ER	Mantel test	Forest cover, Human settlements, Roads density	negative effect for human settlements and roads density	N	Joshi et al., 2013
	Leontopithecus rosalia	Atlantic Forest	Terrestrial	Low mobility	Less mobile arboreal species that rely on tree cover to move	3800	individual	201	Microsatellites	14	Evaluate landscape features and management (reintroductions and translocations) on genetic differentiation	NA	GLM	Land cover (forest, road, pasture and crops)	negative effect for road and pasture (land cover)	N	Moraes et al., 2018
	Phascolarctos cinereus	southeast Queensland (SEQ)	Terrestrial	10km	Arboreal species moving via the ground	20500	individual	1.106	Microsatellites	6	Evaluate landscape drivers of genetic differentiation at varying spatial scales	ER	LMP, LMM	Forest cover (FPC - Foliage projective cover), land cover (forest, urban vegetation, cleared, urban, main roads, highways)	positive effect for forest cover (foliage projective cover) and negative effect for highways	Y	Dudaniec et al., 2013
	Melursus ursinus	Satpura-Maikal landscape in Central India	Terrestrial	NA	NA	100000	population	4	Microsatellites	7	Evaluate forest cover on genetic variation	LCP	Mantel test	Forest cover	no effect	N	Dutta et al., 2015
	Dasyurus hallucatus	Kimberley, Pilbara and Kakadu -north-western Australia,	Terrestrial	4km	Males tend to disperse further than females	2000000	population and individual	10 / 249	Microsatellites	12	Evaluate landscape features on genetic differentiation	ER	Mantel test and MLPE	Terrain ruggedness, distance to water, and rainfall.	negative effect for terrain ruggedness and positive effect for rainfall, both at population level	N	Hohnen et al., 2016
	Hydrochoerus hydrochaeris	Venezuela, Paraguay and Argentina	Terrestrial	NA	Dispersal patterns and distances related to the spatial distribution of water	Orinoco and Del Plata basin	population	23	mtDNA	24	Evaluate river drainages on genetic differentiation at varying spatial scales	NA	Mantel test	River	positive effect for river in Paraguay region and no effect for river in Argentina and Venezuela	N	Byrne et al., 2015
	Panthera tigris	PAs and forested areas outside Pas in the state of Maharashtra, Madhya Pradesh and Chhattisgarh- India.	Terrestrial	500 km	NA	170000	population	9	Microsatellites	12	Evaluate habitat connectivity across nine reserves	LCP	Mantel test and PMT	Human settlement, land cover (forest, degraded and scrub forest, agriculture and built-up areas), traffic (roads)	negative effect for human settlements, built-up areas and traffic (roads)	N	Thatte et al., 2018
	Saimiri oerstedii	Central Pacific region of Costa Rica	Terrestrial	NA	Live in groups of 18 or more individuals, which have home ranges of approximately 200 ha	170	individual	244	Microsatellites	16	Evaluate landscape features and matrix habitats on genetic differentiation	ER	PMT	Land cover (forest, cattle pasture, rivers, oil palm plantations, and residential areas)	negative effect for oil palm plantations (land cover)	N	Blair & Melnick, 2012
Reptiles	Bothrops atrox	Ducke Reserve, Purus – Madeira interﬂuve, Madeira River - Porto Velho, Brazil	Terrestrial and aquatic	Low mobility	Greater density of individuals has been found in areas near streams	160000	individual	32	SNPs	3169	Evaluate environmental, geographical, and species behavioral traits on genetic differentiation	LCP, ER	MLPE, RDA	land cover (vegetation-cover type), seasonality in temperature and rainfall	no effect	N	De Fraga et al., 2017
	Corallus hortulanus	Ducke Reserve, Purus – Madeira interﬂuve, Madeira River - Porto Velho, Brazil	Terrestrial and aquatic	Low mobility	Ambush predator, arboreal, and it tends to be sedentary, spending long periods in small areas	160000	individual	15	SNPs	7805	Evaluate environmental, geographical, and species behavioral traits on genetic differentiation	LCP, ER	MLPE, RDA	land cover (vegetation-cover type), seasonality in temperature and rainfall	negative effect for vegetation-cover type (land cover), seasonality in temperature and rainfall	N	De Fraga et al., 2017
	Leptodeira annulata	Ducke Reserve, Purus – Madeira interﬂuve, Madeira River - Porto Velho, Brazil	Terrestrial and aquatic	High mobility	Active forager, which often moves and hunts at ground level, although it may climb onto vegetation to sleep	160000	individual	23	SNPs	2173	Evaluate environmental, geographical, and species behavioral traits on genetic differentiation	LCP, ER	MLPE, RDA	land cover (vegetation-cover type), seasonality in temperature and rainfall	no effect	N	De Fraga et al., 2017
	Philodryas georgeboulengeri	Ducke Reserve, Purus – Madeira interﬂuve, Madeira River - Porto Velho, Brazil	Terrestrial and aquatic	High mobility	It is an active, diurnal, arboreal predator.	160000	individual	19	SNPs	720	Evaluate environmental, geographical, and species behavioral traits on genetic differentiation	LCP, ER	MLPE, RDA	land cover (vegetation-cover type), seasonality in temperature and rainfall	no effect	N	De Fraga et al., 2017
	Anolis allisoni	Cuba	Terrestrial	Small home ranges	Highly territorial	Cuba	population	20	mtDNA, DNA sequence	NA	Evaluate environmental and geographical factors on genetic differentiation	LCP, ER	SEM, GDM	Temperature, Elevation, Precipitation, Forest cover	an effect of precipitation, but without information regarding direction	N	Wang, Glor & Losos, 2013
	Anolis equestris	Cuba	Terrestrial	Small home ranges	Highly territorial	Cuba	population	10	mtDNA	NA	Evaluate environmental and geographical factors on genetic differentiation	LCP, ER	SEM, GDM	Temperature, Elevation, Precipitation, Forest cover	an effect of temperature, precipitation and forest cover, but without information regarding direction	N	Wang, Glor & Losos, 2013
	Anolis porcatu	Cuba	Terrestrial	Small home ranges	Highly territorial	Cuba	population	20	mtDNA, DNA sequence	NA	Evaluate environmental and geographical factors on genetic differentiation	LCP, ER	SEM, GDM	Temperature, Elevation, Precipitation, Forest cover	an effect of precipitation, but without information regarding direction	N	Wang, Glor & Losos, 2013
	Anolis sagrei	Cuba	Terrestrial	Small home ranges	Highly territorial	Cuba	population	56	mtDNA	NA	Evaluate environmental and geographical factors on genetic differentiation	LCP, ER	SEM, GDM	Temperature, Elevation, Precipitation, Forest cover	an effect of temperature and elevation, but without information regarding direction	N	Wang, Glor & Losos, 2013
	Anolis chlorocyanus	Hispaniola	Terrestrial	Small home ranges	Highly territorial	Hispaniola	population	21	mtDNA, DNA sequence	NA	Evaluate environmental and geographical factors on genetic differentiation	LCP, ER	SEM, GDM	Temperature, Elevation, Precipitation, Forest cover	an effect of precipitation, but without information regarding direction	N	Wang, Glor & Losos, 2013
	Anolis cybotes	Hispaniola	Terrestrial	Small home ranges	Highly territorial	Hispaniola	population	47	mtDNA	NA	Evaluate environmental and geographical factors on genetic differentiation	LCP, ER	SEM, GDM	Temperature, Elevation, Precipitation, Forest cover	an effect of temperature and elevation, but without information regarding direction	N	Wang, Glor & Losos, 2013
	Anolis distichus dominicensis	Hispaniola	Terrestrial	Small home ranges	Highly territorial	Hispaniola	population	8	mtDNA	NA	Evaluate environmental and geographical factors on genetic differentiation	LCP, ER	SEM, GDM	Temperature, Elevation, Precipitation, Forest cover	an effect of temperature and elevation, but without information regarding direction	N	Wang, Glor & Losos, 2013
	Anolis distichus ignigularis	Hispaniola	Terrestrial	Small home ranges	Highly territorial	Hispaniola	population	7	mtDNA	NA	Evaluate environmental and geographical factors on genetic differentiation	LCP, ER	SEM, GDM	Temperature, Elevation, Precipitation, Forest cover	an effect of temperature, but without information regarding direction	N	Wang, Glor & Losos, 2013
	Anolis whitemani	Hispaniola	Terrestrial	Small home ranges	Highly territorial	Hispaniola	population	12	mtDNA	NA	Evaluate environmental and geographical factors on genetic differentiation	LCP, ER	SEM, GDM	Temperature, Elevation, Precipitation, Forest cover	an effect of temperature, precipitation and elevation, but without information regarding direction	N	Wang, Glor & Losos, 2013
	Anolis garmani	Jamaica	Terrestrial	Small home ranges	Highly territorial	Jamaica	population	14	mtDNA	NA	Evaluate environmental and geographical factors on genetic differentiation	LCP, ER	SEM, GDM	Temperature, Elevation, Precipitation, Forest cover	an effect of temperature, elevation and forest cover, but without information regarding direction	N	Wang, Glor & Losos, 2013
	Anolis grahami	Jamaica	Terrestrial	Small home ranges	Highly territorial	Jamaica	population	20	mtDNA	NA	Evaluate environmental and geographical factors on genetic differentiation	LCP, ER	SEM, GDM	Temperature, Elevation, Precipitation, Forest cover	an effect of temperature and elevation, but without information regarding direction	N	Wang, Glor & Losos, 2013
	Anolis lineatopus	Jamaica	Terrestrial	Small home ranges	Highly territorial	Jamaica	population	20	mtDNA	NA	Evaluate environmental and geographical factors on genetic differentiation	LCP, ER	SEM, GDM	Temperature, Elevation, Precipitation, Forest cover	an effect of temperature and elevation, but without information regarding direction	N	Wang, Glor & Losos, 2013
	Anolis cooki	Puerto Rico	Terrestrial	Small home ranges	Highly territorial	Puerto Rico	population	6	mtDNA	NA	Evaluate environmental and geographical factors on genetic differentiation	LCP, ER	SEM, GDM	Temperature, Elevation, Precipitation, Forest cover	an effect of temperature and precipitation, but without information regarding direction	N	Wang, Glor & Losos, 2013
	Anolis cristatellus	Puerto Rico	Terrestrial	Small home ranges	Highly territorial	Puerto Rico	population	20	mtDNA	NA	Evaluate environmental and geographical factors on genetic differentiation	LCP, ER	SEM, GDM	Temperature, Elevation, Precipitation, Forest cover	an effect of precipitation, but without information regarding direction	N	Wang, Glor & Losos, 2013
	Anolis krugi	Puerto Rico	Terrestrial	Small home ranges	Highly territorial	Puerto Rico	population	52	mtDNA	NA	Evaluate environmental and geographical factors on genetic differentiation	LCP, ER	SEM, GDM	Temperature, Elevation, Precipitation, Forest cover	an effect of temperature and elevation, but without information regarding direction	N	Wang, Glor & Losos, 2013
	Anolis poncensis	Puerto Rico	Terrestrial	Small home ranges	Highly territorial	Puerto Rico	population	6	mtDNA	NA	Evaluate environmental and geographical factors on genetic differentiation	LCP, ER	SEM, GDM	Temperature, Elevation, Precipitation, Forest cover	an effect of temperature and precipitation, but without information regarding direction	N	Wang, Glor & Losos, 2013
	Anolis stratulus	Puerto Rico	Terrestrial	Small home ranges	Highly territorial	Puerto Rico	population	19	mtDNA	NA	Evaluate environmental and geographical factors on genetic differentiation	LCP, ER	SEM, GDM	Temperature, Elevation, Precipitation, Forest cover	an effect of temperature, but without information regarding direction	N	Wang, Glor & Losos, 2013
	Phyllodactylus tuberculosus saxatilis	western Mexico	Terrestrial	20 km	Small home ranges	1600	population	11	Microsatellites, mtDNA	10	Evaluate barriers and landscape features on genetic differentiation	ER	MRA	Streams, Temperature, Land cover	an effect of streams and land cover, but without information regarding direction	N	Blair et al., 2014
	Ctenotus inornatus	coast of Australia	Terrestrial	Intermediate dispersal	NA	240000	population	41	Microsatellites	18	Evaluate landscape features on genetic differentiation	ER	Mantel test and PMT	Ocean	negative effect for the Ocean	N	Harradine et al., 2015
	Trachylepis affinis	Cameroon - Central Africa	Terrestrial	Restricted dispersal	NA	NA	population	12	AFLP	191	Evaluate environmental factors on genetic differentiation	NA	GDM, MCPMRT and Mantel Test	Habitat suitability model (annual means, extremes and seasonal variation in temperature and precipitation - 18 bioclimatic variables, tree cover)	positive effect for habitat suitability models	N	Freedman et al., 2010
Amphibians	Hyperolius substriatus	Northern Tanzania and southern Malawi	Terrestrial and aquatic	NA	NA	600000	population	24	mtDNA	3	Evaluate landscape features on genetic differentiation	ER	PMT, Mantel Test and MRDM	Habitat suitability model in present and LGM (mean temperature of coldest quarter, temperature seasonality, temperature annual range, precipitation of coldest quarter, precipitation of wettest month, mean diurnal range, precipitation of warmest quarter, precipitation of driest quarter and precipitation seasonality), slope, waterway	positive effect for habitat suitability models and waterway	N	Lawson, 2013
	Amietia wittei	Northern Tanzania	Terrestrial and aquatic	NA	Patchy distribution	100000	population	8	AFLP	235	Compare landscape features on genetic differentiation for two species	LCP	PMT and MLPE	Topographic distance, slope, roughness, human settlement	positive effect for slope and roughness	N	Zancolli et al., 2014
	Amietia angolensis	Northern Tanzania	Terrestrial and aquatic	NA	Widespread distribution	100000	population	13	AFLP	165	Compare landscape features on genetic differentiation for two species	LCP	PMT and MLPE	Topographic distance, slope, roughness, human settlement	negative effect for topographic distance and human settlement	N	Zancolli et al., 2014
	Atelopus flavescens	Central and northern South America	Terrestrial and aquatic	NA	NA	NA	individual	19	mtDNA	19	Evaluate topography and environmental factors on genetic differentiation	ER	PMT	Habitat suitability model (19 bioclimatic variables)	no effect	N	Guarnizo & Cannatella, 2013
	Atelopus franciscus	Central and northern South America	Terrestrial and aquatic	NA	NA	NA	individual	14	mtDNA	14	Evaluate topography and environmental factors on genetic differentiation	ER	PMT	Habitat suitability model (19 bioclimatic variables)	no effect	N	Guarnizo & Cannatella, 2013
	Atelopus hoogmoedi	Central and northern South America	Terrestrial and aquatic	NA	NA	NA	individual	29	mtDNA	29	Evaluate topography and environmental factors on genetic differentiation	ER	PMT	Habitat suitability model (19 bioclimatic variables)	no effect	N	Guarnizo & Cannatella, 2013
	Atelopus spumarius barbotini	Central and northern South America	Terrestrial and aquatic	NA	NA	NA	individual	9	mtDNA	9	Evaluate topography and environmental factors on genetic differentiation	ER	PMT	Habitat suitability model (19 bioclimatic variables)	no effect	N	Guarnizo & Cannatella, 2013
	Atelopus varius	Central and northern South America	Terrestrial and aquatic	NA	NA	NA	individual	50	mtDNA	25 cox1 , 25 cob	Evaluate topography and environmental factors on genetic differentiation	ER	PMT	Habitat suitability model (19 bioclimatic variables)	an effect of habitat suitability model, but without information regarding direction	N	Guarnizo & Cannatella, 2013
	Craugastor crassidigitus	Central and northern South America	Terrestrial and aquatic	NA	NA	NA	individual	54	mtDNA	27 cox1 , 27 cob	Evaluate topography and environmental factors on genetic differentiation	ER	PMT	Habitat suitability model (19 bioclimatic variables)	an effect of habitat suitability model, but without information regarding direction	N	Guarnizo & Cannatella, 2013
	Craugastor fitzingeri	Central and northern South America	Terrestrial and aquatic	NA	NA	NA	individual	50	mtDNA	30 cox1 , 20 cob	Evaluate topography and environmental factors on genetic differentiation	ER	PMT	Habitat suitability model (19 bioclimatic variables)	an effect of habitat suitability model, but without information regarding direction	N	Guarnizo & Cannatella, 2013
	Craugastor talamancae	Central and northern South America	Terrestrial and aquatic	NA	NA	NA	individual	12	mtDNA	5 cox1 , 7 cob	Evaluate topography and environmental factors on genetic differentiation	ER	PMT	Habitat suitability model (19 bioclimatic variables)	no effect	N	Guarnizo & Cannatella, 2013
	Craugastor podiciferus	Central and northern South America	Terrestrial and aquatic	NA	NA	NA	individual	31	mtDNA	31	Evaluate topography and environmental factors on genetic differentiation	ER	PMT	Habitat suitability model (19 bioclimatic variables)	no effect	N	Guarnizo & Cannatella, 2013
	Dendropsophus labialis	Central and northern South America	Terrestrial and aquatic	NA	NA	NA	individual	62	mtDNA	21 cox1,41 cob	Evaluate topography and environmental factors on genetic differentiation	ER	PMT	Habitat suitability model (19 bioclimatic variables)	no effect	N	Guarnizo & Cannatella, 2013
	Dendropsophus luddeckei	Central and northern South America	Terrestrial and aquatic	NA	NA	NA	individual	59	mtDNA	13 cox1, 37 cob, 9 16S	Evaluate topography and environmental factors on genetic differentiation	ER	PMT	Habitat suitability model (19 bioclimatic variables)	no effect	N	Guarnizo & Cannatella, 2013
	Dendropsophus leucophyllatus	Central and northern South America	Terrestrial and aquatic	NA	NA	NA	individual	14	mtDNA	14	Evaluate topography and environmental factors on genetic differentiation	ER	PMT	Habitat suitability model (19 bioclimatic variables)	no effect	N	Guarnizo & Cannatella, 2013
	Dendropsophus ebraccatus	Central and northern South America	Terrestrial and aquatic	NA	NA	NA	individual	48	mtDNA	48	Evaluate topography and environmental factors on genetic differentiation	ER	PMT	Habitat suitability model (19 bioclimatic variables)	no effect	N	Guarnizo & Cannatella, 2013
	Ameerega hahneli	Central and northern South America	Terrestrial and aquatic	NA	NA	NA	individual	23	mtDNA	23	Evaluate topography and environmental factors on genetic differentiation	ER	PMT	Habitat suitability model (19 bioclimatic variables)	no effect	N	Guarnizo & Cannatella, 2013
	Ameerega trivittata	Central and northern South America	Terrestrial and aquatic	NA	NA	NA	individual	26	mtDNA	26	Evaluate topography and environmental factors on genetic differentiation	ER	PMT	Habitat suitability model (19 bioclimatic variables)	no effect	N	Guarnizo & Cannatella, 2013
	Dendrobates pumilio	Central and northern South America	Terrestrial and aquatic	NA	NA	NA	individual	22	mtDNA	22	Evaluate topography and environmental factors on genetic differentiation	ER	PMT	Habitat suitability model (19 bioclimatic variables)	no effect	N	Guarnizo & Cannatella, 2013
	Allobates femoralis	Central and northern South America	Terrestrial and aquatic	NA	NA	NA	individual	21	mtDNA	21	Evaluate topography and environmental factors on genetic differentiation	ER	PMT	Habitat suitability model (19 bioclimatic variables)	no effect	N	Guarnizo & Cannatella, 2013
	Pristimantis kichwarum	Central and northern South America	Terrestrial and aquatic	NA	NA	NA	individual	68	mtDNA	68	Evaluate topography and environmental factors on genetic differentiation	ER	PMT	Habitat suitability model (19 bioclimatic variables)	no effect	N	Guarnizo & Cannatella, 2013
	Proceratophrys boiei	Central and northern South America	Terrestrial and aquatic	NA	NA	NA	individual	54	mtDNA	54	Evaluate topography and environmental factors on genetic differentiation	ER	PMT	Habitat suitability model (19 bioclimatic variables)	no effect	N	Guarnizo & Cannatella, 2013
	Physalaemus pustulosus	Central and northern South America	Terrestrial and aquatic	NA	NA	NA	individual	24	mtDNA	24	Evaluate topography and environmental factors on genetic differentiation	ER	PMT	Habitat suitability model (19 bioclimatic variables)	no effect	N	Guarnizo & Cannatella, 2013
	Physalaemus petersi	Central and northern South America	Terrestrial and aquatic	NA	NA	NA	individual	64	mtDNA	64	Evaluate topography and environmental factors on genetic differentiation	ER	PMT	Habitat suitability model (19 bioclimatic variables)	no effect	N	Guarnizo & Cannatella, 2013
	Oophaga pumilio	Caribbean lowland region of northeastern Costa Rica	Terrestrial and aquatic	Restricted dispersal	Small home ranges	2500	population	15	Microsatellites	11	Evaluate land use on genetic connectivity for two species	ER	MRDM and RDA	Land cover (Matrix-abundance-derived surfaces for 1986, 2001 and 2011 periods), experiment- derived surfaces for water loss, survival, substrate resistance and predation responses, and a barriers surface.	no effect	N	Nowakowski et al., 2015
	Craugastor bransfordii	Caribbean lowland region of northeastern Costa Rica	Terrestrial and aquatic	Restricted dispersal	Small home ranges	2500	population	17	Microsatellites	10	Evaluate land use on genetic connectivity for two species	ER	MRDM and RDA	Land cover (Matrix-abundance-derived surfaces for 1986, 2001 and 2011 periods), experiment- derived surfaces for water loss, survival, substrate resistance and predation responses, and a barriers surface.	negative effect for land cover (matrix-abundance-derived surfaces for 2011) and experiment-derived surfaces for water loss	N	Nowakowski et al., 2015
	Pseudoeurycea leprosa	Trans-Volcanic Belt of Mexico	Terrestrial and aquatic	NA	Restricted to pine (Pinus), pine–oak (Quercus) and fir (Abies) forests at elevations between 2000 and 3500 m	75000	population	26	mtDNA	1	Evaluate the historical landscape features on genetic differentiation	LCP	Mantel test and PMT	Elevation	no effect	N	Parra-Olea et al., 2012
	Nimbaphrynoides occidentalis	Guinea, Liberia, and Ivory Coast	Terrestrial	Restricted dispersal	Small home range	400	population	3	Microsatellites	8	Evaluate landscape features and interpopulation connectivity	LCP	Mantel test	Elevation	negative effect for elevation	N	Sandberger-Loua, Rödel & Feldhaar, 2018
	Atelopus spp.	G. D. Omar Torrijos H. National Park, Chagres National Park, Colon and Cana field station in the Dari en National Park	Terrestrial and aquatic	Restricted dispersal	NA	120000	population	3	mtDNA	2	Evaluate environmental and geographical factors on genetic differentiation	ER	GLM	Habitat suitability model (19 bioclimatic variables)	an effect of habitat suitability model, but without information regarding direction	N	Paz et al., 2015
	Cochranella euknemos	G. D. Omar Torrijos H. National Park, Chagres National Park, Colon and Cana field station in the Dari en National Park	Terrestrial and aquatic	Restricted dispersal	NA	120000	population	3	mtDNA	2	Evaluate environmental and geographical factors on genetic differentiation	ER	GLM	Habitat suitability model (19 bioclimatic variables)	an effect of habitat suitability model, but without information regarding direction	N	Paz et al., 2015
	Colostethus panamansis	G. D. Omar Torrijos H. National Park, Chagres National Park, Colon and Cana field station in the Dari en National Park	Terrestrial and aquatic	Restricted dispersal	NA	120000	population	3	mtDNA	2	Evaluate environmental and geographical factors on genetic differentiation	ER	GLM	Habitat suitability model (19 bioclimatic variables)	an effect of habitat suitability model, but without information regarding direction	N	Paz et al., 2015
	Colostethus pratti	G. D. Omar Torrijos H. National Park, Chagres National Park, Colon and Cana field station in the Dari en National Park	Terrestrial and aquatic	Restricted dispersal	NA	120000	population	3	mtDNA	2	Evaluate environmental and geographical factors on genetic differentiation	ER	GLM	Habitat suitability model (19 bioclimatic variables)	an effect of habitat suitability model, but without information regarding direction	N	Paz et al., 2015
	Craugastor bransfordii	G. D. Omar Torrijos H. National Park, Chagres National Park, Colon and Cana field station in the Dari en National Park	Terrestrial and aquatic	Restricted dispersal	NA	120000	population	2	mtDNA	2	Evaluate environmental and geographical factors on genetic differentiation	ER	GLM	Habitat suitability model (19 bioclimatic variables)	an effect of habitat suitability model, but without information regarding direction	N	Paz et al., 2015
	Craugastor crassidigitus	G. D. Omar Torrijos H. National Park, Chagres National Park, Colon and Cana field station in the Dari en National Park	Terrestrial and aquatic	Restricted dispersal	NA	120000	population	2	mtDNA	2	Evaluate environmental and geographical factors on genetic differentiation	ER	GLM	Habitat suitability model (19 bioclimatic variables)	an effect of habitat suitability model, but without information regarding direction	N	Paz et al., 2015
	Craugastor fitzingeri	G. D. Omar Torrijos H. National Park, Chagres National Park, Colon and Cana field station in the Dari en National Park	Terrestrial and aquatic	Restricted dispersal	NA	120000	population	3	mtDNA	2	Evaluate environmental and geographical factors on genetic differentiation	ER	GLM	Habitat suitability model (19 bioclimatic variables)	an effect of habitat suitability model, but without information regarding direction	N	Paz et al., 2015
	Craugastor gollmeri	G. D. Omar Torrijos H. National Park, Chagres National Park, Colon and Cana field station in the Dari en National Park	Terrestrial and aquatic	Restricted dispersal	NA	120000	population	2	mtDNA	2	Evaluate environmental and geographical factors on genetic differentiation	ER	GLM	Habitat suitability model (19 bioclimatic variables)	an effect of habitat suitability model, but without information regarding direction	N	Paz et al., 2015
	Craugastor opimus/megacephalus	G. D. Omar Torrijos H. National Park, Chagres National Park, Colon and Cana field station in the Dari en National Park	Terrestrial and aquatic	Restricted dispersal	NA	120000	population	2	mtDNA	2	Evaluate environmental and geographical factors on genetic differentiation	ER	GLM	Habitat suitability model (19 bioclimatic variables)	an effect of habitat suitability model, but without information regarding direction	N	Paz et al., 2015
	Craugastor talamancae	G. D. Omar Torrijos H. National Park, Chagres National Park, Colon and Cana field station in the Dari en National Park	Terrestrial and aquatic	Restricted dispersal	NA	120000	population	2	mtDNA	2	Evaluate environmental and geographical factors on genetic differentiation	ER	GLM	Habitat suitability model (19 bioclimatic variables)	an effect of habitat suitability model, but without information regarding direction	N	Paz et al., 2015
	Diasporus spp.	G. D. Omar Torrijos H. National Park, Chagres National Park, Colon and Cana field station in the Dari en National Park	Terrestrial and aquatic	Restricted dispersal	NA	120000	population	3	mtDNA	2	Evaluate environmental and geographical factors on genetic differentiation	ER	GLM	Habitat suitability model (19 bioclimatic variables)	an effect of habitat suitability model, but without information regarding direction	N	Paz et al., 2015
	Engystomops pustulosus	G. D. Omar Torrijos H. National Park, Chagres National Park, Colon and Cana field station in the Dari en National Park	Terrestrial and aquatic	Restricted dispersal	NA	120000	population	3	mtDNA	2	Evaluate environmental and geographical factors on genetic differentiation	ER	GLM	Habitat suitability model (19 bioclimatic variables)	an effect of habitat suitability model, but without information regarding direction	N	Paz et al., 2015
	Espadarana prosoblepon	G. D. Omar Torrijos H. National Park, Chagres National Park, Colon and Cana field station in the Dari en National Park	Terrestrial and aquatic	Restricted dispersal	NA	120000	population	3	mtDNA	2	Evaluate environmental and geographical factors on genetic differentiation	ER	GLM	Habitat suitability model (19 bioclimatic variables)	an effect of habitat suitability model, but without information regarding direction	N	Paz et al., 2015
	Gastrotheca cornuta	G. D. Omar Torrijos H. National Park, Chagres National Park, Colon and Cana field station in the Dari en National Park	Terrestrial and aquatic	Restricted dispersal	NA	120000	population	2	mtDNA	2	Evaluate environmental and geographical factors on genetic differentiation	ER	GLM	Habitat suitability model (19 bioclimatic variables)	an effect of habitat suitability model, but without information regarding direction	N	Paz et al., 2015
	Hyalinobatrachium colymbiphyllum	G. D. Omar Torrijos H. National Park, Chagres National Park, Colon and Cana field station in the Dari en National Park	Terrestrial and aquatic	Restricted dispersal	NA	120000	population	2	mtDNA	2	Evaluate environmental and geographical factors on genetic differentiation	ER	GLM	Habitat suitability model (19 bioclimatic variables)	an effect of habitat suitability model, but without information regarding direction	N	Paz et al., 2015
	Hyalinobatrachium fleischmanni	G. D. Omar Torrijos H. National Park, Chagres National Park, Colon and Cana field station in the Dari en National Park	Terrestrial and aquatic	Restricted dispersal	NA	120000	population	2	mtDNA	2	Evaluate environmental and geographical factors on genetic differentiation	ER	GLM	Habitat suitability model (19 bioclimatic variables)	an effect of habitat suitability model, but without information regarding direction	N	Paz et al., 2015
	Hyloscirtus colymba	G. D. Omar Torrijos H. National Park, Chagres National Park, Colon and Cana field station in the Dari en National Park	Terrestrial and aquatic	Restricted dispersal	NA	120000	population	3	mtDNA	2	Evaluate environmental and geographical factors on genetic differentiation	ER	GLM	Habitat suitability model (19 bioclimatic variables)	an effect of habitat suitability model, but without information regarding direction	N	Paz et al., 2015
	Lithobates warszewitschii	G. D. Omar Torrijos H. National Park, Chagres National Park, Colon and Cana field station in the Dari en National Park	Terrestrial and aquatic	Restricted dispersal	NA	120000	population	2	mtDNA	2	Evaluate environmental and geographical factors on genetic differentiation	ER	GLM	Habitat suitability model (19 bioclimatic variables)	an effect of habitat suitability model, but without information regarding direction	N	Paz et al., 2015
	Pristimantis caryophyllaceus	G. D. Omar Torrijos H. National Park, Chagres National Park, Colon and Cana field station in the Dari en National Park	Terrestrial and aquatic	Restricted dispersal	NA	120000	population	3	mtDNA	2	Evaluate environmental and geographical factors on genetic differentiation	ER	GLM	Habitat suitability model (19 bioclimatic variables)	an effect of habitat suitability model, but without information regarding direction	N	Paz et al., 2015
	Pristimantis cerasinus	G. D. Omar Torrijos H. National Park, Chagres National Park, Colon and Cana field station in the Dari en National Park	Terrestrial and aquatic	Restricted dispersal	NA	120000	population	2	mtDNA	2	Evaluate environmental and geographical factors on genetic differentiation	ER	GLM	Habitat suitability model (19 bioclimatic variables)	an effect of habitat suitability model, but without information regarding direction	N	Paz et al., 2015
	Pristimantis cruentus	G. D. Omar Torrijos H. National Park, Chagres National Park, Colon and Cana field station in the Dari en National Park	Terrestrial and aquatic	Restricted dispersal	NA	120000	population	2	mtDNA	2	Evaluate environmental and geographical factors on genetic differentiation	ER	GLM	Habitat suitability model (19 bioclimatic variables)	an effect of habitat suitability model, but without information regarding direction	N	Paz et al., 2015
	Pristimantis museosus / P. aff. Museosus	G. D. Omar Torrijos H. National Park, Chagres National Park, Colon and Cana field station in the Dari en National Park	Terrestrial and aquatic	Restricted dispersal	NA	120000	population	3	mtDNA	2	Evaluate environmental and geographical factors on genetic differentiation	ER	GLM	Habitat suitability model (19 bioclimatic variables)	an effect of habitat suitability model, but without information regarding direction	N	Paz et al., 2015
	Pristimantis ridens	G. D. Omar Torrijos H. National Park, Chagres National Park, Colon and Cana field station in the Dari en National Park	Terrestrial and aquatic	Restricted dispersal	NA	120000	population	2	mtDNA	2	Evaluate environmental and geographical factors on genetic differentiation	ER	GLM	Habitat suitability model (19 bioclimatic variables)	an effect of habitat suitability model, but without information regarding direction	N	Paz et al., 2015
	Pristimantis taeniatus	G. D. Omar Torrijos H. National Park, Chagres National Park, Colon and Cana field station in the Dari en National Park	Terrestrial and aquatic	Restricted dispersal	NA	120000	population	3	mtDNA	2	Evaluate environmental and geographical factors on genetic differentiation	ER	GLM	Habitat suitability model (19 bioclimatic variables)	an effect of habitat suitability model, but without information regarding direction	N	Paz et al., 2015
	Rhaebo haematiticus	G. D. Omar Torrijos H. National Park, Chagres National Park, Colon and Cana field station in the Dari en National Park	Terrestrial and aquatic	Restricted dispersal	NA	120000	population	3	mtDNA	2	Evaluate environmental and geographical factors on genetic differentiation	ER	GLM	Habitat suitability model (19 bioclimatic variables)	an effect of habitat suitability model, but without information regarding direction	N	Paz et al., 2015
	Sachatamia albomaculata	G. D. Omar Torrijos H. National Park, Chagres National Park, Colon and Cana field station in the Dari en National Park	Terrestrial and aquatic	Restricted dispersal	NA	120000	population	2	mtDNA	2	Evaluate environmental and geographical factors on genetic differentiation	ER	GLM	Habitat suitability model (19 bioclimatic variables)	an effect of habitat suitability model, but without information regarding direction	N	Paz et al., 2015
	Sachatamia ilex	G. D. Omar Torrijos H. National Park, Chagres National Park, Colon and Cana field station in the Dari en National Park	Terrestrial and aquatic	Restricted dispersal	NA	120000	population	2	mtDNA	2	Evaluate environmental and geographical factors on genetic differentiation	ER	GLM	Habitat suitability model (19 bioclimatic variables)	an effect of habitat suitability model, but without information regarding direction	N	Paz et al., 2015
	Silverstoneia flotator	G. D. Omar Torrijos H. National Park, Chagres National Park, Colon and Cana field station in the Dari en National Park	Terrestrial and aquatic	Restricted dispersal	NA	120000	population	2	mtDNA	2	Evaluate environmental and geographical factors on genetic differentiation	ER	GLM	Habitat suitability model (19 bioclimatic variables)	an effect of habitat suitability model, but without information regarding direction	N	Paz et al., 2015
	Silverstoneia nubicola	G. D. Omar Torrijos H. National Park, Chagres National Park, Colon and Cana field station in the Dari en National Park	Terrestrial and aquatic	Restricted dispersal	NA	120000	population	3	mtDNA	2	Evaluate environmental and geographical factors on genetic differentiation	ER	GLM	Habitat suitability model (19 bioclimatic variables)	an effect of habitat suitability model, but without information regarding direction	N	Paz et al., 2015
	Strabomantis bufoniformis	G. D. Omar Torrijos H. National Park, Chagres National Park, Colon and Cana field station in the Dari en National Park	Terrestrial and aquatic	Restricted dispersal	NA	120000	population	3	mtDNA	2	Evaluate environmental and geographical factors on genetic differentiation	ER	GLM	Habitat suitability model (19 bioclimatic variables)	an effect of habitat suitability model, but without information regarding direction	N	Paz et al., 2015
	Teratohyla spinosa	G. D. Omar Torrijos H. National Park, Chagres National Park, Colon and Cana field station in the Dari en National Park	Terrestrial and aquatic	Restricted dispersal	NA	120000	population	2	mtDNA	2	Evaluate environmental and geographical factors on genetic differentiation	ER	GLM	Habitat suitability model (19 bioclimatic variables)	an effect of habitat suitability model, but without information regarding direction	N	Paz et al., 2015
	Pseudoeurycea leprosa	Trans-Mexican Volcanic Belt (TVB)	Terrestrial	Restricted dispersal	NA	50000	population	23	Microsatellites	11	Evaluate temporal and spatial climate and environmental variability on genetic differentiation	ER	PMT and Mantel Test	Habitat suitability model (climatic variables , topographic and landcover)	no effect	N	Velo-Antõn et al., 2013
	Dendropsophus ebraccatus	northeastern CR,southeastern CR/PA, northwestern CR, southwestern CRand central PA	Terrestrial and aquatic	Restricted dispersal	Small body size, lower tolerance to desiccation, and higher philopatry	80000	population	15	Microsatellites	54	Evaluate landscape features on genetic differentiation	NA	Mantel test	Biogeographic barriers	negative effect for biogeographic barriers	N	Robertson, Duryea & Zamudio, 2009
	Agalychnis callidryas	northeastern CR,southeastern CR/PA, northwestern CR, southwestern CRand central PA	Terrestrial and aquatic	High dispersal	Broader physiological tolerance afforded by larger body size	80000	population	21	Microsatellites	83	Evaluate landscape features on genetic differentiation	NA	Mantel test	Biogeographic barriers	negative effect for biogeographic barriers	N	Robertson, Duryea & Zamudio, 2009
	Dendrobates pumilio	CostaRica and in the Bocas del Toro region of Panama	Terrestrial and aquatic	NA	NA	10000	population	19	Microsatellites	15	Evaluate environmental factors on genetic differentiation	LCP	Mantel test and PMT	Habitat suitability model \ Land cover (broadleaf forest, palm forest, coniferous forest, scrub ⁄shrub, agricultural, mangrove, urban, swamp ⁄wetland and barren rock ⁄sand)	positive effect for broadleaf forest, palm forest, coniferous forest (land cover) and negative effect for scrub ⁄shrub, agricultural, mangrove, urban, swamp ⁄wetland and barren rock ⁄sand (land cover)	N	Wang & Summers, 2010
	Ameivula ocellifera	Caatinga biome-Brazil	Terrestrial	NA	Both males and females migrate	700	population	46	mtDNA	88	Evaluate physical barriers, environmental factors, current and past climate on genetic differentiation	LCP	GDM	Habitat suitability model (temperature seasonality, isothermality, min temperature of coldest month, mean diurnal range, precipitation seasonality, precipitation of coldest quarter, annual precipitation, precipitation of driest quarter, max temperature of warmest month, precipitation of warmest quarter, mean temperature of wettest quarter) and slope, roughness, and rivers	negative effect for rivers	N	Oliveira et al., 2017
	Physalaemus pustulosus	NW Costa Rica, SW Costa Rica and Panama	Terrestrial and aquatic	200 m	NA	NA	population	25	Microsatellites, mtDNA	6	Evaluate environmental factors on genetic differentiation	LCP	NA	Habitat suitability model (altitude, annual mean temperature, mean temperature diurnal range, isothermality,temperature seasonality,maximum temperature of warmest month, mean temperature of driest quarter,mean temperature of coldest quarter, annual precipitation, precipitation of wettest month, precipitation seasonality, and precipitation of driest quarter)	an effect of habitat suitability model, but without information regarding direction	N	Prohl, Ron & Ryan, 2010
Insects	Eciton burchellii	Montane forest around Monteverde - Costa Rica	Terrestrial	NA	Dispersal is primarily determined by the mode of colony founding	43	individual	25	Microsatellites	7	Evaluate forest fragmentation and elevation on genetic differentiation	ER	PMT, RFA	Elevation, land cover	positive effect for elevation and negative effect for land cover	Y	Soare et al., 2014
	Eciton burchellii	San Lorenzo Protected Forest – Panama	Terrestrial	63 km	Successful queens live 6 years in the wild	120 \ protected forest	population	16	Microsatellites, mtDNA	8	Evaluate landscape features on genetic differentiation	ER	Mantel test and PMT	Forest cover, mature forests, other forest types, the River Chagres, streams, stream banks, roads, sea, lakes and swamps	Microsatellites : positive effect for mature forests and negative effect for deforestation. MtDNA : positive effect for streams, stream banks and negative effect for the River Chagres, sea	Y	Pérez-Espona, McLeod & Franks, 2012
	Euglossa championi	Southern Costa Rica	Terrestrial	NA	NA	NA	individual	151	Microsatellites	8	Evaluate patterns of dispersal over a large fragmented area	NA	Mantel test and PMT	Forest cover	no effect	Y	Suni, Bronstein & Brosi, 2014
	Frieseomelitta varia	São Paulo, SP	Terrestrial	Restricted dispersal	NA	NA	population	5	Microsatellites	16	Evaluate landscape features on genetic differentiation	ER	MLPE	Elevation, mean annual temperature, mean annual precipitation, forest cover, transport routes	no effect	Y	Jaffé et al., 2016b
	Melipona compressipes	Belterra, PA, São Luís, MA	Terrestrial	Restricted dispersal	NA	NA	population	11	Microsatellites	16	Evaluate landscape features on genetic differentiation	ER	MLPE	Elevation, mean annual temperature, mean annual precipitation, forest cover, transport routes	no effect	Y	Jaffé et al., 2016b
	Melipona marginata	Salesópolis, SP, São Paulo, SP	Terrestrial	Restricted dispersal	NA	NA	population	5	Microsatellites	16	Evaluate landscape features on genetic differentiation	ER	MLPE	Elevation, mean annual temperature, mean annual precipitation, forest cover, transport routes	no effect	Y	Jaffé et al., 2016b
	Melipona quadrifasciata	Araci, BA, Carira, SE, Pariquera-Açu, SP, São Paulo, SP	Terrestrial	Restricted dispersal	NA	NA	population	15	Microsatellites	16	Evaluate landscape features on genetic differentiation	ER	MLPE	Elevation, mean annual temperature, mean annual precipitation, forest cover, transport routes	no effect	Y	Jaffé et al., 2016b
	Melipona scutellaris	Alagoinhas, BA, Coruripe, BA, Ituberá, BA, Igarassu, PE	Terrestrial	Restricted dispersal	NA	NA	population	4	Microsatellites	16	Evaluate landscape features on genetic differentiation	ER	MLPE	Elevation, mean annual temperature, mean annual precipitation, forest cover, transport routes	no effect	Y	Jaffé et al., 2016b
	Melipona seminigra	NA	Terrestrial	Restricted dispersal	NA	NA	population	10	Microsatellites	16	Evaluate landscape features on genetic differentiation	ER	MLPE	Elevation, mean annual temperature, mean annual precipitation, forest cover, transport routes	no effect	Y	Jaffé et al., 2016b
	Melipona subnitida	Jardim do Seridó, RN	Terrestrial	Restricted dispersal	NA	NA	population	5	Microsatellites	16	Evaluate landscape features on genetic differentiation	ER	MLPE	Elevation, mean annual temperature, mean annual precipitation, forest cover, transport routes	no effect	Y	Jaffé et al., 2016b
	Melipona yucatanica	NA	Terrestrial	Restricted dispersal	NA	NA	population	4	Microsatellites	16	Evaluate landscape features on genetic differentiation	ER	MLPE	Elevation, mean annual temperature, mean annual precipitation, forest cover, transport routes	no effect	Y	Jaffé et al., 2016b
	Nannotrigona testaceicornis	São Paulo, SP	Terrestrial	Restricted dispersal	NA	NA	population	6	Microsatellites	16	Evaluate landscape features on genetic differentiation	ER	MLPE	Elevation, mean annual temperature, mean annual precipitation, forest cover, transport routes	no effect	Y	Jaffé et al., 2016b
	Partamona helleri	São Paulo, SP	Terrestrial	Restricted dispersal	NA	NA	population	5	Microsatellites	16	Evaluate landscape features on genetic differentiation	ER	MLPE	Elevation, mean annual temperature, mean annual precipitation, forest cover, transport routes	negative effect for elevation and transport routes	Y	Jaffé et al., 2016b
	Partamona mulata	NA	Terrestrial	Restricted dispersal	NA	NA	population	5	Microsatellites	16	Evaluate landscape features on genetic differentiation	ER	MLPE	Elevation, mean annual temperature, mean annual precipitation, forest cover, transport routes	no effect	Y	Jaffé et al., 2016b
	Plebeia remota	Salesópolis, SP, São Francisco de Paulo, RS	Terrestrial	Restricted dispersal	NA	NA	population	4	Microsatellites	16	Evaluate landscape features on genetic differentiation	ER	MLPE	Elevation, mean annual temperature, mean annual precipitation, forest cover, transport routes	no effect	Y	Jaffé et al., 2016b
	Scaptotrigona bipunctata	PR, Salesópolis, SP	Terrestrial	Restricted dispersal	NA	NA	population	8	Microsatellites	16	Evaluate landscape features on genetic differentiation	ER	MLPE	Elevation, mean annual temperature, mean annual precipitation, forest cover, transport routes	no effect	Y	Jaffé et al., 2016b
	Scaptotrigona hellweger	NA	Terrestrial	Restricted dispersal	NA	NA	population	3	Microsatellites	16	Evaluate landscape features on genetic differentiation	ER	MLPE	Elevation, mean annual temperature, mean annual precipitation, forest cover, transport routes	no effect	Y	Jaffé et al., 2016b
	Scaptotrigona xanthotricha	Alagoinhas, BA, Malhador, SE	Terrestrial	Restricted dispersal	NA	NA	population	25	Microsatellites	16	Evaluate landscape features on genetic differentiation	ER	MLPE	Elevation, mean annual temperature, mean annual precipitation, forest cover, transport routes	no effect	Y	Jaffé et al., 2016b
	Tetragonisca angustula	Guaíra, PR, Prudentópolis, PR	Terrestrial	Restricted dispersal	NA	NA	population	17	Microsatellites	16	Evaluate landscape features on genetic differentiation	ER	MLPE	Elevation, mean annual temperature, mean annual precipitation, forest cover, transport routes	no effect	Y	Jaffé et al., 2016b
	Trigona spinipes	Salesópolis, SP, São Paulo, SP	Terrestrial	Restricted dispersal	NA	NA	population	3	Microsatellites	16	Evaluate landscape features on genetic differentiation	ER	MLPE	Elevation, mean annual temperature, mean annual precipitation, forest cover, transport routes	no effect	Y	Jaffé et al., 2016b
	Partamona bilineata	Tropical mountain cloud forest corridor (Mantel TestCFC) northeast od Baja-Verapaz in the centre of Guatemala	Terrestrial	Restricted dispersal	NA	900	population and individual	6 / 108	Microsatellites, mtDNA	8 / 1	Evaluate landscape features on genetic differentiation	ER	MLPE	Elevation, forest cover, land cover	no effect	Y	Landaverde-González et al., 2017
	Busseola fusca	sub-Saharan African countries	Terrestrial	NA	NA	NA	individual	628	Microsatellites	7	Evaluate landscape features on genetic differentiation	ER	Mantel Test, GLM and RDA	Habitat suitability models (elevation, mean annual temperature, temperature seasonality, temperature annual range, mean temperature of driest quarter, annual precipitation, precipitation seasonality and precipitation of warmest quarter)	an effect of habitat suitability model, but without information regarding direction	N	Dupas et al., 2014
	Euglossa cordata	São Paulo, southeastern Brazil	Terrestrial	High mobility	Individuals are highly mobile and their populations are large, facilitating dispersal and population connectivity	700	population	14	Microsatellites	5	Evaluate island isolation on genetic variation	NA	Mantel test and PMT	Sea	negative effect for sea	N	Boff et al., 2014
	Cactoblastis cactorum	Caribbean islands	Terrestrial	NA	Occurrence of hurricanes exert a strong effect reducing or promoting gene flow and dispersal	NA	population	8	mtDNA	1	Evaluate dispersal routes and dispersal sources towards Florida.	ER	Mantel test	Hurricanes and tropical storms	no effect	N	Andraca-Gómez et al., 2015
	Trigona spinipes	Mossoro, Poços de Caldas, Sao Paulo	Terrestrial	NA	Long-distance dispersal across human-altered landscapes	6000	individual	115	Microsatellites	16	Evaluate landscape feactures across agricultural landscape mosaics on genetic differentiation	ER	MLPE	Elevation, mean annual temperature, mean annual precipitation, forest cover, roads	no effect	Y	Jaffé et al., 2016a
Fish	Mogurnda mogurnda	Daly River, northern Australia	Aquatic	Restricted dispersal	Life history traits that limit its dispersal potential at river basin scales	15000	population	17	Microsatellites, mtDNA	9 / 8	Evaluate landscape features on genetic differentiation	NA	Mantel test and PMT	Elevation	no effect	Y	Cook et al., 2011
	Triportheus albus	Cautário River, Sotério River, Arara River, São Lourenço River, Jaciparaná River, Puruzinho Lake, Sampaio Lake, Catalão Lake and Ariaú channel	Aquatic	Intermediate dispersal	NA	1000000	population	19	mtDNA	2	Evaluate the processes that explain the genetic population structure of a migratory fish	NA	RDA	Waterfall, "water colour", floodplain size, land cover (flooded vegetation composition)	an effect of “water colour”, “floodplain size”, and land cover (“flooded vegetation composition”), but without information regarding direction	N	Queiroz et al., 2017
	Steatogenys elegans	Negro, Amazon and Madeira Rivers - Amazon Basin	Aquatic	NA	NA	14000	population	3	AFLP	310	Evaluate environmental factors on genetic differentiation	NA	PMT	"water color"	negative effect for “water colour”	N	Cooke, Landguth & Beheregaray, 2014
Birds	Glyphorynchus spirurus	Ecuador	Terrestrial	NA	NA	100000	population	15	AFLP	136	Evaluate environmetal factors on genetic differentiation	ER	GDM	Temperature, precipitation, elevation, forest cover, Andean barrier	an effect of temperature, precipitation and Andean barrier, but without information regarding direction	N	Thomassen et al., 2009
	Pyrrhura pfrimeri	Paranã River Basin - Brazil	Terrestrial	NA	NA	2000	population	6	Microsatellites	8	Evaluate forest fragmentation on genetic differentiation	LCP	Mantel test	Forest cover	positive effect for forest cover	N	Miller et al., 2013
	Pipilo maculatus	Mexico	Terrestrial	NA	NA	400000	population	19	AFLP	561	Effects of habitat connectivity on introgression at two hybrid zones	ER	Mantel test	Land cover (pine/oak forests and associated edge agricultural habitat, matrix habitat)	positive effect for pine/oak forests and associated edge agricultural habitat (land cover)	N	Kingston et al., 2014
	Pipilo ocai	Mexico	Terrestrial	NA	NA	400000	population	19	mtDNA	63	Effects of habitat connectivity on introgression at two hybrid zones	ER	Mantel test	Land cover (pine/oak forests and associated edge agricultural habitat, matrix habitat)	positive effect for pine/oak forests and associated edge agricultural habitat (land cover)	N	Kingston et al., 2014
	Setophaga plumbea	Island of Guadeloupe	Terrestrial	High dispersal	NA	400	population	20	Microsatellites	12	Evaluate habitat fragmentation on population connectivity	LCP, ER	Mantel test and PMT	Elevation, roads, land cover (open sea, coastal sea, urban area, agriculture, pasture, inland wetland)	negative effect for urban area, pasture and inland wetland (land cover)	N	Khimoun et al., 2017
	Ara macao	Tambopata/Candamo region of the south-eastern Peruvian Amazon	Terrestrial	NA	NA	13661	population and individual	3 / 166	Microsatellites	9	Evaluate landscape features on genetic differentiation	ER	Mantel Test, PMT and MRDM	Elevation, canopy height, river system and above-ground carbon distribution (biomass)	negative effect for elevation	Y	Olah et al., 2017
Abbreviations
Resistance metric	Least-cost distances (LCD), Eletrical resistance (ER), Least-cost path (LCP), log-transformed geographic distances (log10 GGD), least- cost pathway distances (LCPD) least-cost corridor distances (LCCD)
Statistical method	Mantel and Partial Mantel tests (PMT), Maximum likelihood population effects (MLPE) models, generalized dissimilarity models (GDM), redundancy analyses (RDA), multiple regression on distance matrices (MRDM), generalized linear models (GLM), linear mixed-effect models (LMM), Monte Carlo permutation matrix regression technique (MCPMRT), matrix regression approach (MRA), Random Forest Analysis (RFA)…
	NA: Information not available

## Sheet: References
References
Andraca-Gómez G., Ordano M., Boege K., Domínguez CA., Piñero D., Pérez-Ishiwara R., Pérez-Camacho J., Cañizares M., Fornoni J. 2015. A potential invasion route of Cactoblastis cactorum within the Caribbean region matches historical hurricane trajectories. Biological Invasions 17:1397–1406. DOI: 10.1007/s10530-014-0802-2.
Atickem A., Rueness EK., Loe LE., Serbezov D., Bekele A., Stenseth NC. 2013. Population genetic structure and connectivity in the endangered Ethiopian mountain Nyala (Tragelaphus buxtoni): Recommending dispersal corridors for future conservation. Conservation Genetics 14:427–438. DOI: 10.1007/s10592-013-0450-6.
Balkenhol N., Pardini R., Cornelius C., Fernandes F., Sommer S. 2013. Landscape-level comparison of genetic diversity and differentiation in a small mammal inhabiting different fragmented landscapes of the Brazilian Atlantic Forest. Conservation Genetics 14:355–367. DOI: 10.1007/s10592-013-0454-2.
Blair C., Jiménez Arcos VH., de la Cruz FRM., Murphy RW. 2014. Historical and contemporary demography of leaf-toed geckos (Phyllodactylidae: Phyllodactylus tuberculosus saxatilis) in the Mexican dry forest. Conservation Genetics 16:419–429. DOI: 10.1007/s10592-014-0668-y.
Blair ME., Melnick DJ. 2012. Scale-dependent effects of a heterogeneous landscape on genetic differentiation in the Central American squirrel monkey (Saimiri oerstedii). PLoS ONE 7(8):e43027. DOI: 10.1371/journal.pone.0043027.
Boff S., Soro A., Paxton RJ., Alves-dos-Santos I. 2014. Island isolation reduces genetic diversity and connectivity but does not significantly elevate diploid male production in a neotropical orchid bee. Conservation Genetics 15:1123–1135. DOI: 10.1007/s10592-014-0605-0.
Byrne MS., Quintana RD., Bolkovic ML., Cassini MH., Túnez JI. 2015. The role of river drainages in shaping the genetic structure of capybara populations. Genetica 143:645–656. DOI: 10.1007/s10709-015-9862-1.
de Campos Telles MP., Dobrovolski R., da Silva e Souza K., de Souza Lima J., Collevatti RG., Soares TN., Chaves LJ., Diniz-Filho JAF. 2014. Disentangling landscape effects on population genetic structure of a Neotropical savanna tree. Natureza & Conservação 12:65–70. DOI: 10.4322/natcon.2014.012.
Carvalho C., Ribeiro MC., Côrtes MC., Galetti M., Collevatti RG. 2015. Contemporary and historic factors influence differently genetic differentiation and diversity in a tropical palm. Heredity 115:216–224. DOI: 10.1038/hdy.2015.30.
Castilho CS., Marins-Sá LG., Benedet RC., Freitas TO. 2011. Landscape genetics of mountain lions (Puma concolor) in southern Brazil. Mammalian Biology 76:476–483. DOI: 10.1016/j.mambio.2010.08.002.
Castilla AR., Pope N., Jaffé R., Jha S. 2016. Elevation, not deforestation, promotes genetic differentiation in a pioneer tropical tree. PLoS ONE 11:e0156694. DOI: 10.1371/journal.pone.0156694.
Chávez-Pesqueira M., Suaréz-Montes P., Castillo G., NúÑez-Farfán J. 2014. Habitat fragmentation threatens wild population of Carica Papaya (Caricaceae) in a lowland Rainforest. American Journal of Botany 101:1–10. DOI: 10.3732/ajb.1400051.
Cleary KA., Waits LP., Finegan B. 2017. Comparative landscape genetics of two frugivorous bats in a biological corridor undergoing agricultural intensification. Molecular Ecology 26:4603–4617. DOI: 10.1111/mec.14230.
Cook BD., Kennard MJ., Real K., Pusey BJ., Hughes JM. 2011. Landscape genetic analysis of the tropical freshwater fish Mogurnda mogurnda (Eleotridae) in a monsoonal river basin: Importance of hydrographic factors and population history. Freshwater Biology 56:812–827. DOI: 10.1111/j.1365-2427.2010.02527.x.
Cooke GM., Landguth EL., Beheregaray LB. 2014. Riverscape genetics identifies replicated ecological divergence across an Amazonian ecotone. Evolution 68:1947–1960. DOI: 10.1111/evo.12410.
Deacon NJ., Cavender-Bares J. 2015. Limited pollen dispersal contributes to population genetic structure but not local adaptation in Quercus oleoides forests of Costa Rica. PLoS ONE 10:e0138783. DOI: 10.1371/journal.pone.0138783.
Dudaniec RY., Rhodes JR., Wilmer WJ., Lyons M., Lee KE., McAlpine CA., Carrick FN. 2013. Using multilevel models to identify drivers of landscape-genetic structure among management areas. Molecular Ecology 22:3752–3765. DOI: 10.1111/mec.12359.
Dudaniec RY., Wilmer WJ., Hanson JO., Warren M., Bell S., Rhodes JR. 2016. Dealing with uncertainty in landscape genetic resistance models: A case of three co-occurring marsupials. Molecular Ecology 25:470–486. DOI: 10.1111/mec.13482.
Dupas S., Le Ru B., Branca A., Faure N., Gigot G., Campagne P., Sezonlin M., Ndemah R., Ong’Amo G., Calatayud PA., Silvain JF. 2014. Phylogeography in continuous space: Coupling species distribution models and circuit theory to assess the effect of contiguous migration at different climatic periods on genetic differentiation in Busseola fusca (Lepidoptera: Noctuidae). Molecular Ecology 23:2313–23…
Dutta T., Sharma S., Maldonado JE., Panwar HS., Seidensticker J. 2015. Genetic variation, structure, and gene flow in a sloth bear (Melursus ursinus) Meta-population in the Satpura-Maikal landscape of central India. PLoS ONE 10(5):e0123384. DOI: 10.1371/journal.pone.0123384
Epps CW., Castillo JA., Schmidt-Küntzel A., Du Preez P., Stuart-Hill G., Jago M., Naidoo R. 2013a. Contrasting historical and recent gene flow among African buffalo herds in the caprivi strip of Namibia. Journal of Heredity 104:172–181. DOI: 10.1093/jhered/ess142.
Epps CW., Wasser SK., Keim JL., Mutayoba BM., Brashares JS. 2013b. Quantifying past and present connectivity illuminates a rapidly changing landscape for the African elephant. Molecular Ecology 22:1574–1588. DOI: 10.1111/mec.12198.
De Fraga R., Lima AP., Magnusson WE., Ferrão M., Stow AJ. 2017. Contrasting patterns of gene flow for Amazonian snakes that actively forage and those that wait in ambush. Journal of Heredity 108:524–534. DOI: 10.1093/jhered/esx051.
Freedman AH., Thomassen HA., Buermann W., Smith TB. 2010. Genomic signals of diversification along ecological gradients in a tropical lizard. Molecular Ecology 19:3773–3788. DOI: 10.1111/j.1365-294X.2010.04684.x.
Garrido-Garduño T., Téllez-Valdés O., Manel S., Vázquez-Domínguez E. 2016. Role of habitat heterogeneity and landscape connectivity in shaping gene flow and spatial population structure of a dominant rodent species in a tropical dry forest. Journal of Zoology 298:293–302. DOI: 10.1111/jzo.12307.
Guarnizo CE., Cannatella DC. 2013. Genetic divergence within frog species is greater in topographically more complex regions. Journal of Zoological Systematics and Evolutionary Research 51:333–340. DOI: 10.1111/jzs.12027.
Harradine EL., Andrew ME., Thomas JW., How RA., Schmitt LH., Spencer PBS. 2015. Importance of dispersal routes that minimize open-ocean movement to the genetic structure of island populations. Conservation Biology 29:1704–1714. DOI: 10.1111/cobi.12555.
Hohnen R., Tuft KD., Legge S., Hillyer M., Spencer PBS., J. Radford I., Johnson CN., Burridge CP. 2016. Rainfall and topography predict gene flow among populations of the declining northern quoll (Dasyurus hallucatus). Conservation Genetics 17:1213–1228. DOI: 10.1007/s10592-016-0856-z.
Jaffé R., Castilla A., Pope N., Imperatriz-Fonseca VL., Metzger JP., Arias MC., Jha S. 2016a. Landscape genetics of a tropical rescue pollinator. Conservation Genetics 17:267–278. DOI: 10.1007/s10592-015-0779-0.
Jaffé R., Pope N., Acosta AL., Alves DA., Arias MC., De la Rúa P., Francisco FO., Giannini TC., González-Chaves A., Imperatriz-Fonseca VL., Tavares MG., Jha S., Carvalheiro LG. 2016b. Beekeeping practices and geographic distance, not land use, drive gene flow across tropical bees. Molecular Ecology 25:5345–5358. DOI: 10.1111/mec.13852.
Joshi A., Vaidyanathan S., Mondo S., Edgaonkar A., Ramakrishnan U. 2013. Connectivity of tiger (Panthera tigris) populations in the human-influenced forest mosaic of central India. PLoS ONE 8(11):e77980. DOI: 10.1371/journal.pone.0077980.
Khimoun A., Peterman W., Eraud C., Faivre B., Navarro N., Garnier S. 2017. Landscape genetic analyses reveal fine-scale effects of forest fragmentation in an insular tropical bird. Molecular Ecology 26:4906–4919. DOI: 10.1111/mec.14233.
Kingston SE., Navarro-Sigüenza AG., García-Trejo EA., Vázquez-Miranda H., Fagan WF., Braun MJ. 2014. Genetic differentiation and habitat connectivity across towhee hybrid zones in Mexico. Evolutionary Ecology 28:277–297. DOI: 10.1007/s10682-013-9673-8.
Landaverde-González P., Enríquez E., Ariza MA., Murray T., Paxton RJ., Husemann M. 2017. Fragmentation in the clouds? The population genetics of the native bee Partamona bilineata (Hymenoptera: Apidae: Meliponini) in the cloud forests of Guatemala. Conservation Genetics 18:631–643. DOI: 10.1007/s10592-017-0950-x.
Lanes ÉC., Pope NS., Alves R., Carvalho Filho NM., Giannini TC., Giulietti AM., Imperatriz-Fonseca VL., Monteiro W., Oliveira G., Silva AR., Siqueira JO., Souza-Filho PW., Vasconcelos S., Jaffé R. 2018. Landscape genomic conservation assessment of a narrow-endemic and a widespread morning glory from amazonian savannas. Frontiers in Plant Science 9:532. DOI: 10.3389/fpls.2018.00532.
Lawson LP. 2013. Diversification in a biodiversity hot spot: Landscape correlates of phylogeographic patterns in the African spotted reed frog. Molecular Ecology 22:1947–1960. DOI: 10.1111/mec.12229.
Mendéz-González ID., Jardón-Barbolla L., Jaramillo-Correa JP. 2017. Differential landscape effects on the fine-scale genetic structure of populations of a montane conifer from central Mexico. Tree Genetics and Genomes 13:30. DOI: 10.1007/s11295-017-1112-5.
Miller MP., Bianchi CA., Mullins TD., Haig SM. 2013. Associations between forest fragmentation patterns and genetic structure in Pfrimer’s Parakeet (Pyrrhura pfrimeri), an endangered endemic to central Brazil’s dry forests. Conservation Genetics 14:333–343. DOI: 10.1007/s10592-012-0420-4.
Moraes AM., Ruiz C., Jr PG., Niebuhr BBS., Alexandre B., Muylaert RL., Grativol A., Ribeiro JW., Ferreira AN., Ribeiro MC. 2018. Landscape resistance influences effective dispersal of endangered golden lion tamarins within the Atlantic Forest. Biological Conservation 224:0–23. DOI: 10.1017/S0950268817001236.
Nowakowski AJ., Dewoody JA., Fagan ME., Willoughby JR., Donnelly MA. 2015. Mechanistic insights into landscape genetic structure of two tropical amphibians using field-derived resistance surfaces. Molecular Ecology 24:580–595. DOI: 10.1111/mec.13052.
Ntie S., Davis AR., Hils K., Mickala P., Thomassen HA., Morgan K., Vanthomme H., Gonder MK., Anthony NM. 2017. Evaluating the role of Pleistocene refugia, rivers and environmental variation in the diversification of central African duikers (genera Cephalophus and Philantomba). BMC Evolutionary Biology 17:1–17. DOI: 10.1186/s12862-017-1054-4.
Olah G., Smith AL., Asner GP., Brightsmith DJ., Heinsohn RG., Peakall R. 2017. Exploring dispersal barriers using landscape genetic resistance modelling in scarlet macaws of the Peruvian Amazon. Landscape Ecology 32:445–456. DOI: 10.1007/s10980-016-0457-8.
Oliveira EF., Martinez PA., São-Pedro VA., Gehara M., Burbrink FT., Mesquita DO., Garda AA., Colli GR., Costa GC. 2017. Climatic suitability, isolation by distance and river resistance explain genetic variation in a Brazilian whiptail lizard. Heredity 120:251–265. DOI: 10.1038/s41437-017-0017-2.
Parra-Olea G., Windfield JC., Velo-Antón G., Zamudio KR. 2012. Isolation in habitat refugia promotes rapid diversification in a montane tropical salamander. Journal of Biogeography 39:353–370. DOI: 10.1111/j.1365-2699.2011.02593.x.
Paz A., Ibáñez R., Lips KR., Crawford AJ. 2015. Testing the role of ecology and life history in structuring genetic variation across a landscape: A trait-based phylogeographic approach. Molecular Ecology 24:3723–3737. DOI: 10.1111/mec.13275.
Pérez-Espona S., McLeod JE., Franks NR. 2012. Landscape genetics of a top neotropical predator. Molecular Ecology 21:5969–5985. DOI: 10.1111/mec.12088.
Poelchau MF., Hamrick JL. 2012. Differential effects of landscape-level environmental features on genetic structure in three codistributed tree species in Central America. Molecular Ecology 21:4970–4982. DOI: 10.1111/j.1365-294X.2012.05755.x.
Prohl H., Ron SR., Ryan MJ. 2010. Ecological and genetic divergence between two lineages of Middle American tungara frogs Physalaemus (=Engystomops) pustulosus. BMC Evolutionary Biology 10:146. DOI: 10.1186/1471-2148-10-146.
Queiroz LJ De., Torrente-vilara G., Quilodran C., Rodrigues C., Montoya-burgos JI. 2017. Multifactorial genetic divergence processes drive the onset of speciation in an Amazonian fish. PLoS ONE 12:e0189349. DOI: 10.1371/journal.pone.0189349.
Quéméré E., Crouau-Roy B., Rabarivola C., Louis EE., Chikhi L. 2010. Landscape genetics of an endangered lemur (Propithecus tattersalli) within its entire fragmented range. Molecular Ecology 19:1606–1621. DOI: 10.1111/j.1365-294X.2010.04581.x.
Ramírez-Barahona S., Eguiarte LE. 2014. Changes in the distribution of cloud forests during the last glacial predict the patterns of genetic diversity and demographic history of the tree fern Alsophila firma (Cyatheaceae). Journal of Biogeography 41:2396–2407. DOI: 10.1111/jbi.12396.
Ramírez-Barahona S., González C., González-Rodríguez A., Ornelas JF. 2017. The influence of climatic niche preferences on the population genetic structure of a mistletoe species complex. New Phytologist 214:1751–1761. DOI: 10.1111/nph.14471.
Ray A., Ray R. 2014. Rapid divergence of ecotypes of an invasive plant. AoB PLANTS 6:1–13. DOI: 10.1093/aobpla/plu052.
Reddy PA., Cushman SA., Srivastava A., Sarkar MS., Shivaji S. 2017. Tiger abundance and gene flow in Central India are driven by disparate combinations of topography and land cover. Diversity and Distributions 23:863–874. DOI: 10.1111/ddi.12580.
Robertson JM., Duryea MC., Zamudio KR. 2009. Discordant patterns of evolutionary differentiation in two Neotropical treefrogs. Molecular Ecology 18:1375–1395. DOI: 10.1111/j.1365-294X.2009.04126.x.
Ruiz-Lopez MJ., Barelli C., Rovero F., Hodges K., Roos C., Peterman WE., Ting N. 2015. A novel landscape genetic approach demonstrates the effects of human disturbance on the Udzungwa red colobus monkey (Procolobus gordonorum). Heredity 116:167–176. DOI: 10.1038/hdy.2015.82.
Sandberger-Loua L., Rödel MO., Feldhaar H. 2018. Gene-flow in the clouds: landscape genetics of a viviparous, montane grassland toad in the tropics. Conservation Genetics 19:169–180. DOI: 10.1007/s10592-017-1029-4.
Santos AS., Cazetta E., Dodonov P., Faria D., Gaiotto FA. 2016. Landscape-scale deforestation decreases gene flow distance of a keystone tropical palm, Euterpe edulis Mart (Arecaceae). Ecology and Evolution 6:6586–6598. DOI: 10.1002/ece3.2341.
Soare TW., Kumar A., Naish KA., O’Donnell S. 2014. Genetic evidence for landscape effects on dispersal in the army ant Eciton burchellii. Molecular Ecology 23:96–109. DOI: 10.1111/mec.12573.
Suni SS., Bronstein JL., Brosi BJ. 2014. Spatio-temporal genetic structure of a tropical bee species suggests high dispersal over a fragmented landscape. Biotropica 46:202–209. DOI: 10.1111/btp.12084.
Thatte P., Joshi A., Vaidyanathan S., Landguth E., Ramakrishnan U. 2018. Maintaining tiger connectivity and minimizing extinction into the next century_ Insights from landscape genetics and spatially-explicit simulations. Biological Conservation 218:181–191. DOI: 10.1016/j.biocon.2017.12.022.
Thomassen HA., Buermann W., Milá B., Graham CH., Cameron SE., Schneider CJ., Pollinger JP., Saatchi S., Wayne RK., Smith TB. 2009. Modeling environmentally associated morphological and genetic variation in a rainforest bird, and its application to conservation prioritization. Evolutionary Applications 3:1-16. DOI: 10.1111/j.1752-4571.2009.00093.x.
Thomassen HA., Freedman AH., Brown DM., Buermann W., Jacobs DK. 2013. Regional differences in seasonal timing of rainfall discriminate between genetically distinct East African Giraffe Taxa. PLoS ONE 8:e77191. DOI: 10.1371/journal.pone.0077191.
Trénel P., Hansen MM., Normand S., Borchsenius F. 2008. Landscape genetics, historical isolation and cross-Andean gene flow in the wax palm, Ceroxylon echinulatum (Arecaceae). Molecular Ecology 17:3528–3540. DOI: 10.1111/j.1365-294X.2008.03853.x.
Velo-Antõn G., Parra JL., Parra-Olea G., Zamudio KR. 2013. Tracking climate change in a dispersal-limited species: Reduced spatial and genetic connectivity in a montane salamander. Molecular Ecology 22:3261–3278. DOI: 10.1111/mec.12310.
Wang IJ., Glor RE., Losos JB. 2013. Quantifying the roles of ecology and geography in spatial genetic divergence. Ecology Letters 16:175–182. DOI: 10.1111/ele.12025.
Wang IJ., Summers K. 2010. Genetic structure is correlated with phenotypic divergence rather than geographic isolation in the highly polymorphic strawberry poison-dart frog. Molecular Ecology 19:447–458. DOI: 10.1111/j.1365-294X.2009.04465.x.
Yumnam B., Jhala YV., Qureshi Q., Maldonado JE., Gopal R., Saini S., Srinivas Y., Fleischer RC. 2014. Prioritizing tiger conservation through landscape genetics and habitat linkages. PLoS ONE 9:e111207. DOI: 10.1371/journal.pone.0111207.
Zancolli G., Rödel MO., Steffan-Dewenter I., Storfer A. 2014. Comparative landscape genetics of two river frog species occurring at different elevations on Mount Kilimanjaro. Molecular Ecology 23:4989–5002. DOI: 10.1111/mec.12921.
