# Supplementary material for: Everything you always wanted to know about gene flow in tropical landscapes (but were afraid to ask)
Source: PeerJ. 2019 Feb 13;7:e6446. doi: 10.7717/peerj.6446 (PMC6377592; doi:10.7717/peerj.6446)
Supplement: Dataset S2 [file peerj-07-6446-s002.xlsx]

## Sheet: Dataset_S2
Taxon	Species	Effect of habitat loss/fragmentation	Land_variable	Reference
Plant	Dipteryx alata	negative	Forest cover	de Campos Telles et al., 2014
Plant	Euterpe edulis	negative	Resistance surface – land cover	Carvalho et al., 2015
Plant	Miconia affins	no effect	Deforestation*	Castilla et al., 2016
Plant	Euterpe edulis	negative	Forest cover	Santos et al., 2016
Plant	Carica papaya	negative	Fragments vs continuous forest	Chavez-Pesqueira et al., 2014
		no effect	Resistance surface – land cover
Mammal	Propithecus tattersalli	no effect	Resistance surface – land cover	Quéméré et al., 2010
Mammal	Panthera tigris	negative	Resistance surface – land cover	Yumnan et al., 2014
Mammal	Procolobus gordonum	no effect	Resistance surface – land cover	Ruiz-Lopez et al., 2015
Mammal	Marmosops incanus	negative	Forest cover	Balkenhol et al., 2013
Mammal	Corolla castanea	negative	Forest cover	Cleary, Waits & Finegan, 2017
Mammal	Artibeus jamaicensis	no effect	Forest cover	Cleary, Waits & Finegan, 2017
Mammal	Panthera tigris	negative	Forest cover	Joshi et al., 2013
Mammal	Phascolartus cinereus	no effect	Rate of change in forest	Dudaniec et al., 2013
Mammal	Melursus ursinus	no effect	Forest cover	Dutta et al., 2015
Mammal	Leontopithecus rosalia	negative	Resistance surface – land cover	Moraes et al., 2018
Reptile	Plyllodatylus tuberculosus	no effect	Resistance surface – land cover	Blair et al., 2014
Amphibian	Craugastor bransfordii	negative	Resistance surface – land cover	Nowakowski et al., 2015
Amphibian	Oophaga pumilio	no effect	Resistance surface – land cover
Insect	Eciton burchellii	negative	Deforestation*	Soare et al., 2014
Insect	Eciton burchellii	negative	Deforestation*	Pérez-Espona, McLeod & Franks, 2012
Insect	Euglossa championi	no effect	Presence or ausence of forest	Suni, Bronstein & Brosi, 2014
Insect	Frieseomelitta varia	no effect	Deforestation*	Jaffé et al., 2016b
Insect	Melipona compressipes	no effect	Deforestation*	Jaffé et al., 2016b
Insect	Melipona marginata	no effect	Deforestation*	Jaffé et al., 2016b
Insect	Melipona quadrifasciata	no effect	Deforestation*	Jaffé et al., 2016b
Insect	Melipona scutellaris	no effect	Deforestation*	Jaffé et al., 2016b
Insect	Melipona seminigra	no effect	Deforestation*	Jaffé et al., 2016b
Insect	Melipona subnitida	no effect	Deforestation*	Jaffé et al., 2016b
Insect	Melipona yucatanica	no effect	Deforestation*	Jaffé et al., 2016b
Insect	Nannotrigona testaceicornis	no effect	Deforestation*	Jaffé et al., 2016b
Insect	Partamona helleri	no effect	Deforestation*	Jaffé et al., 2016b
Insect	Partamona mulata	no effect	Deforestation*	Jaffé et al., 2016b
Insect	Plebeia remota	no effect	Deforestation*	Jaffé et al., 2016b
Insect	Scaptotrigona bipunctata	no effect	Deforestation*	Jaffé et al., 2016b
Insect	Scaptotrigona hellweger	no effect	Deforestation*	Jaffé et al., 2016b
Insect	Scaptotrigona xanthotricha	no effect	Deforestation*	Jaffé et al., 2016b
Insect	Tetragonisca angustula	no effect	Deforestation*	Jaffé et al., 2016b
Insect	Trigona spinipes	no effect	Deforestation*	Jaffé et al., 2016b
Insect	Partamona bilineata	no effect	Forest cover	Landaverde-González et al., 2017
Insect	Trigona spinipes	no effect	Forest cover	Jaffé et al., 2016a
Bird	Phyrrhura pfrimeri	negative	Forest cover	Miller et al., 2013
Bird	Setophaga plumbea	negative	Resistance surface – land cover	Khimoun et al., 2017
*Deforestation = 1 – proportion of forest cover
